# Supplementary material for: An Effective Approach to Acquire the Impurity Diffusion Coefficients in Binary Alloys with Quantified Uncertainties
Source: MDPI journal article supplement (doi:10.3390/met11050809), 2021-05-16
Supplement: s1 [file s1]

## Supplementary Materials

# An Effective Approach to Acquire the Impurity Diffusion Coefficients in Binary Alloys with Quantified Uncertainties

Yueheng Zhang<sup>1</sup>, Jianpeng Zou<sup>1</sup>, Xiaoke Wu<sup>1,\*</sup>, Chunming Deng<sup>2</sup>, and Lijun Zhang<sup>1,\*</sup>

<sup>1</sup> State Key Laboratory of Powder Metallurgy, Central South University, Changsha 410083, China; 183312107@csu.edu.cn (Y.Z.); zoujp@csu.edu.cn (J.Z.)

<sup>2</sup> Institute of New Materials, Guangdong Academy of Sciences, National Engineering Laboratory for Modern Materials Surface Engineering Technology, The key Lab of Guangdong for Modern Surface Engineering Technology, Guangzhou 510651, China; dengchunming@gdinm.com (C.D.)

\* Correspondence: XiaokeWu@csu.edu.cn (X.W.); lijun.zhang@csu.edu.cn (L.Z.)  
Tel.: +86-731-8883-6812; Fax: +86-731-8871-0855(L.Z.)

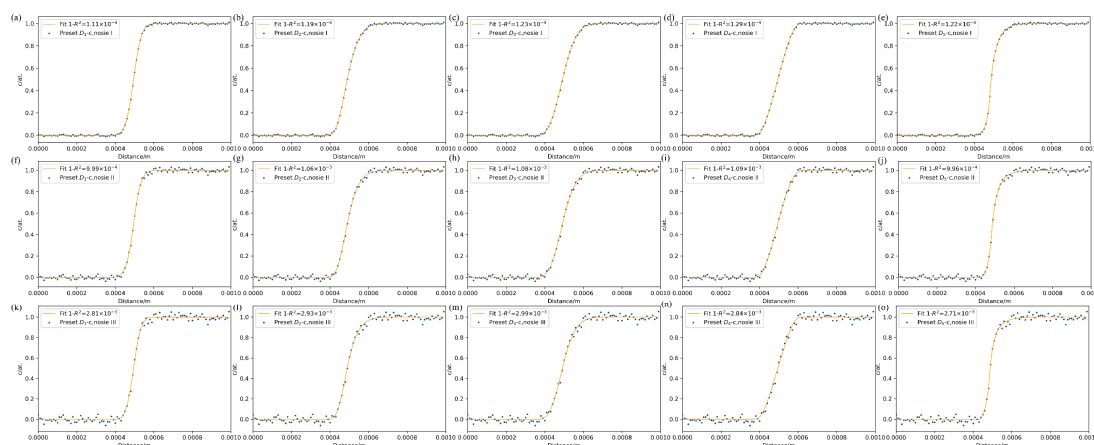

**Figure S1.** Composition profiles fitted by distribution functions compared with the  $c-x$  data due to the pre-set  $D_1$ ,  $D_2$ ,  $D_3$ ,  $D_4$ ,  $D_5$  with different noise levels. (a–e) noise level I; (f–j) noise level II; (k–o) noise level III.

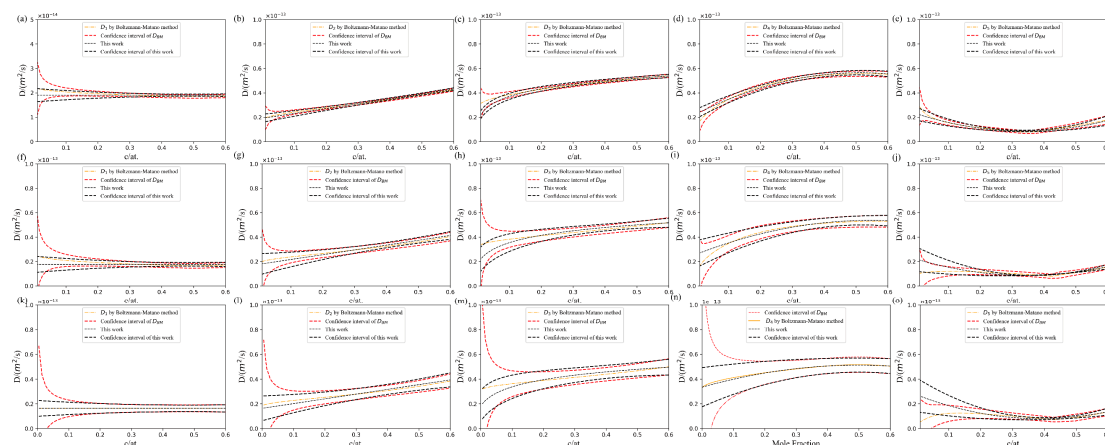

**Figure S2.** Fitted interdiffusion coefficients together with uncertainties compared with the interdiffusion coefficient evaluated using the Boltzmann–Matano method from the  $c-x$  data due to the pre-set  $D_1$ ,  $D_2$ ,  $D_3$ ,  $D_4$ ,  $D_5$  with noise and uncertainties evaluated using the uncertainty quantification approach. (a–e) noise level I; (f–j) noise level II; (k–o) noise level III.

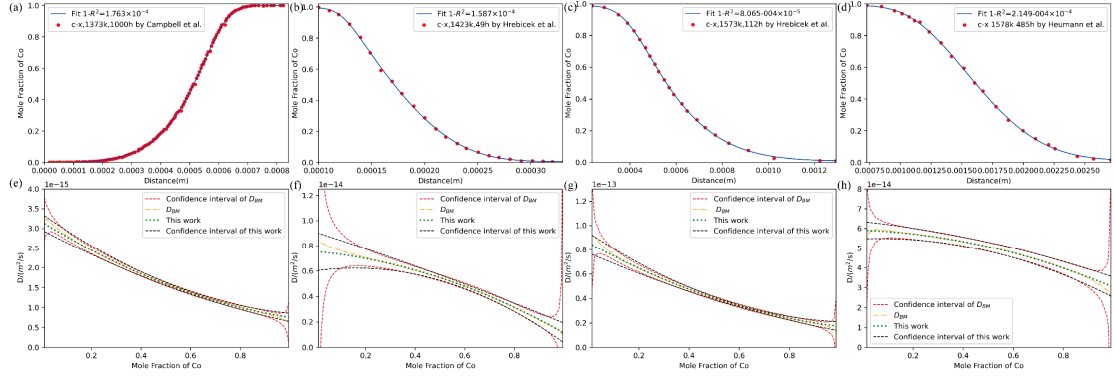

**Figure S3.** (a–d) Composition profiles fitted by distribution functions compared with the experimental data of the Co/Ni diffusion couples annealed at different temperatures [1–4]; (e–h) presently fitted interdiffusion coefficients and uncertainties compared with the interdiffusion coefficients evaluated using the Boltzmann–Matano method and the uncertainties quantified using the uncertainty quantification approach.

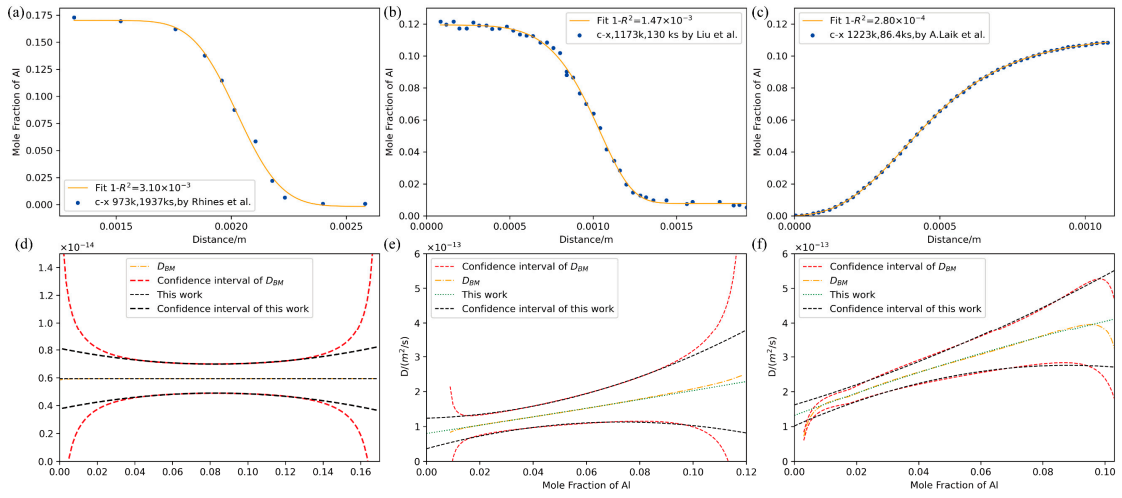

**Figure S4.** (a–c) Composition profiles fitted by distribution functions compared with the experimental data of the Al - Cu/Cu diffusion couples annealed at different temperatures [5–7]; (d–f) presently fitted interdiffusion coefficients and uncertainties compared with the interdiffusion coefficients evaluated using the Boltzmann–Matano method and the uncertainties quantified using the uncertainty quantification approach.

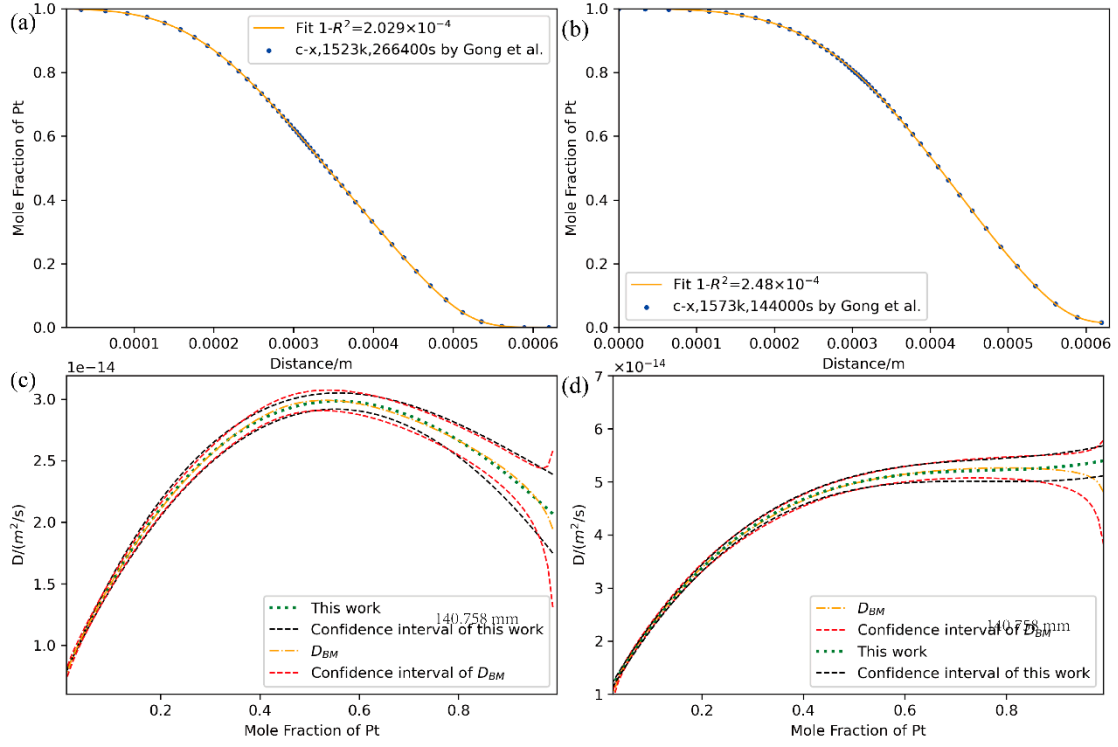

**Figure S5.** (a–b) Composition profiles fitted by distribution functions compared with the experimental data of the Ni/Pt diffusion couples annealed at different temperatures [8]; (c–d) presently fitted interdiffusion coefficients and uncertainties compared with the interdiffusion coefficients evaluated using the Boltzmann–Matano method and the uncertainties quantified using the uncertainty quantification approach.

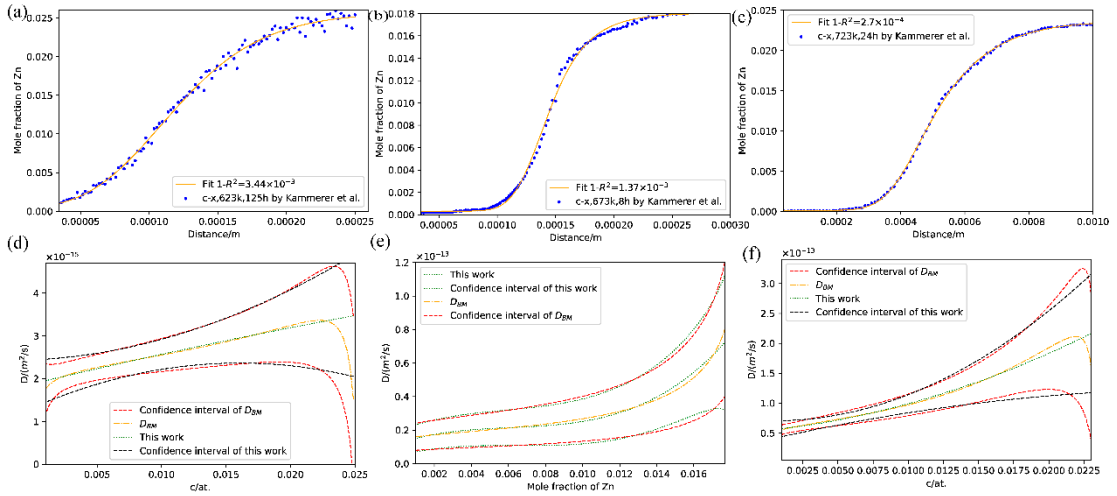

**Figure S6.** (a,b) Composition profiles fitted by distribution functions compared with the experimental data of the hcp Mg/Zn diffusion couples annealed at different temperatures [9]; (c,d) presently fitted interdiffusion coefficients and uncertainties compared with the interdiffusion coefficients evaluated using the Boltzmann–Matano method and the uncertainties quantified using the uncertainty quantification approach.

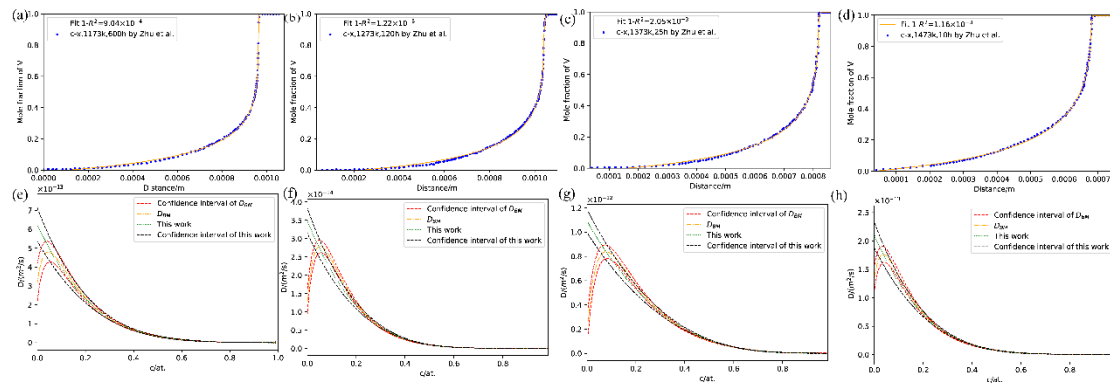

**Figure S7.** (a–b) Composition profiles fitted by distribution functions compared with the experimental data of the bcc Ti/V diffusion couples annealed at different temperatures [10]; (c, d) presently fitted interdiffusion coefficients and uncertainties compared with the interdiffusion coefficients evaluated using the Boltzmann–Matano method and the uncertainties quantified using the uncertainty quantification approach.

## References

1. Heumann, T.; Kottmann, A. On the diffusion processes in the substitutional mixed crystals. *Z. Fur Met.* **1953**, *44*, 139–154.
2. Campbell, C.E. A New Technique for Evaluating Diffusion Mobility Parameters. *J. Phase Equilibria Diffus.* **2005**, *26*, 435–440.
3. Iijima, Y.; Hirano, K.-I. Interdiffusion in Co-Ni alloys. *J. Jpn. Inst. Met.* **1971**, *35*, 511–517.
4. Hřebíček, J.; Kučera, J.; Stránský, K. Determination of interdiffusion coefficients in the Co-Ni system with the use of spline function. *Czechoslov. J. Phys. B* **1975**, *25*, 1181–1191.
5. Liu, D.; Zhang, L.; Du, Y.; Xu, H.; Liu, S.; Liu, L. Assessment of atomic mobilities of Al and Cu in fcc Al–Cu alloys. *Calphad* **2009**, *33*, 761–768.
6. Laik, A.; Bhanumurthy, K.; Kale, G. Diffusion in Cu (Al) solid solution. *Defect Diffus. Forum Trans. Tech. Publ.* **2008**, *279*, 63–69.
7. Mehl, R.; Rhines, F. Rates of diffusion in the alpha solid solutions of copper. *AIME Trans.* **1938**, *128*, 185–221.
8. Gong, W.; Zhang, L.; Yao, D.; Zhou, C. Diffusivities and atomic mobilities in fcc Ni–Pt alloys. *Scr. Mater.* **2009**, *61*, 100–103.
9. Kammerer, C.; Kulkarni, N.S.; Warmack, R.J.; Sohn, Y.H. Interdiffusion and impurity diffusion in polycrystalline Mg solid solution with Al or Zn. *J. Alloy. Compd.* **2014**, *617*, 968–974.
10. Zhu, L.; Zhang, Q.; Chen, Z.; Wei, C.; Cai, G.-M.; Jiang, L.; Jin, Z.; Zhao, J.-C. Measurement of interdiffusion and impurity diffusion coefficients in the bcc phase of the Ti–X (X = Cr, Hf, Mo, Nb, V, Zr) binary systems using diffusion multiples. *J. Mater. Sci.* **2017**, *52*, 3255–3268.
