# Supplementary material for: An Effective Approach to Acquire the Impurity Diffusion Coefficients in Binary Alloys with Quantified Uncertainties
Source: MDPI journal article supplement (doi:10.3390/met11050809), 2021-05-16
Supplement: s1 [file s1]

Archive with 1 entries (1 files):
- metals-1190533-supplementary.pdf
